# Supplementary material for: Thermostable and Long-Circulating Albumin-Conjugated Arthrobacter globiformis Urate Oxidase
Source: MDPI journal article supplement (doi:10.3390/pharmaceutics13081298), 2021-08-19
Supplement: s1 [file s1]

# Supplementary Materials: Thermostable and long-circulating albumin-conjugated *Arthrobacter globiformis* urate oxidase

Byungseop Yang and Inchan Kwon

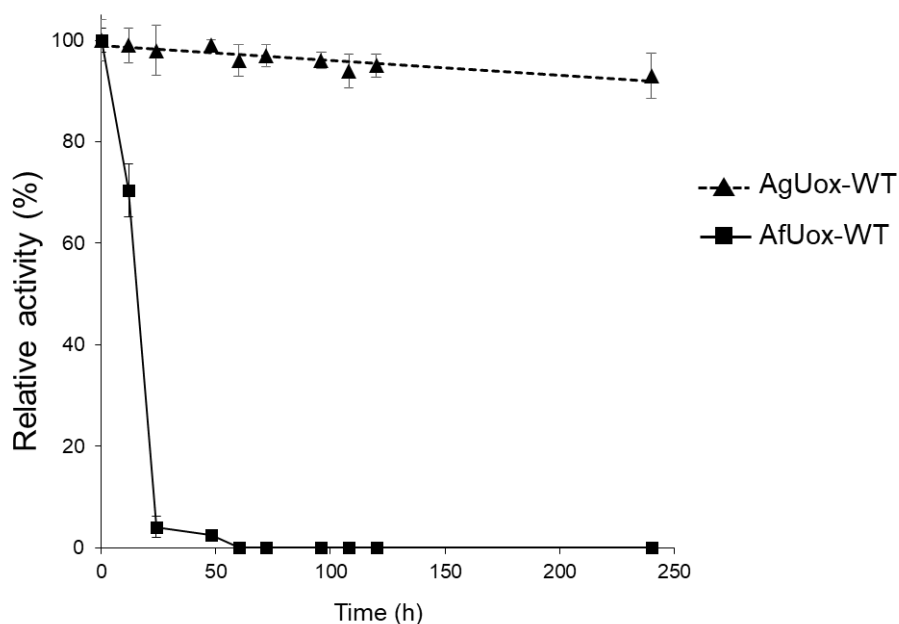

**Figure S1.** Time-course enzymatic activity of AfUox-WT and AgUox-WT. The enzymatic activity was determined using enzymatic activity assay, as described in ‘Material and Methods’ (section 2.6). Relative activity of AfUox-WT and AgUox-WT was normalized to that of AfUox-WT.

|       |                                                                                              |     |
|-------|----------------------------------------------------------------------------------------------|-----|
| AgUox | MTATAETSTGKVVLGQNQYGKAEVRLVKVTRNT--ARHEIQDLNVTSQLRGDFEAAHTA                                  | 58  |
| AfUox | -----MSAVKAARYGKDNVRVYKVKHDEKTVQTVYEMTVCVLLEGEIETSYTK                                        | 49  |
|       | .: :*** :*: ** :. : : :.* *.*:*:***                                                          |     |
| AgUox | GNAHVATDTQKNTVYAFAR <b>DGF</b> AT-TEEFLLRLGKHFT <b>EGFD</b> WVTGGRWAAQQ <b>F</b> WDR         | 117 |
| AfUox | ADNSVIVATDSIKNTIYITAKQNPVTPPELFGSILGTHFIEKYNHIAAAHVNI VCHRWTR                                | 109 |
|       | .** :****: ***:* *: :. * * * **.* * * : : :. : . * *                                         |     |
| AgUox | I <b>N</b> --- <b>D</b> HDHAFSRNKSEVRTAVL-EIS <b>GE</b> QAIVAGIEGLTVLKSTGSEFHGFPRDKYT        | 172 |
| AfUox | MDIDGKPHPHSFIRDSEEKRNQVDVVEGKGIDIKSSLSGLTVLKSTNSQFWGFLRDEYT                                  | 169 |
|       | :: * ** *:..* *.. : :.* * : :.*****.*:* ** **                                                |     |
| AgUox | TL <b>Q</b> ETTDRILATDVSARWRYNT <b>V</b> ----- <b>E</b> VDFDAVYASVRGLLLKAF <b>AETH</b> SLALQ | 223 |
| AfUox | TLKET <b>W</b> DRILSTDVATWQWKNFSGLQEVRSVHPKFDATWATAREVTLKTF <b>AED</b> NSASVQ                | 229 |
|       | **:* ***:***.* *: :. :.***.:*:.* : **:* ** : * :*                                            |     |
| AgUox | QTM YEMGRAVIE <b>THPE</b> IDEIKMSLPNKHFLVDLQPFG---QDNPNEVFYAADRPYGLI                         | 279 |
| AfUox | ATMYKMAEQILARQQLIETVEYSLPNKH YFEIDLSWHKGLQNTGKNAEVFAPQSDPNGLI                                | 289 |
|       | ***:*. : : : * : : *****:* :*. :. : : *** . * **                                             |     |
| AgUox | EATIQREGSRADHHHHHH-                                                                          | 297 |
| AfUox | KCTVGRSSLKSKLHHHHHH                                                                          | 308 |
|       | :.*: *. : :. *****                                                                           |     |

(Identity: 38.5 %)

**Figure S2.** Alignment of the amino acid sequences of *Arthrobacter globiformis* urate oxidase (AgUox) and *Aspergillus flavus* urate oxidase (AfUox) using Clustal W [1]. The albumin conjugation sites in the AgUox and AfUox are marked in red and blue, respectively.

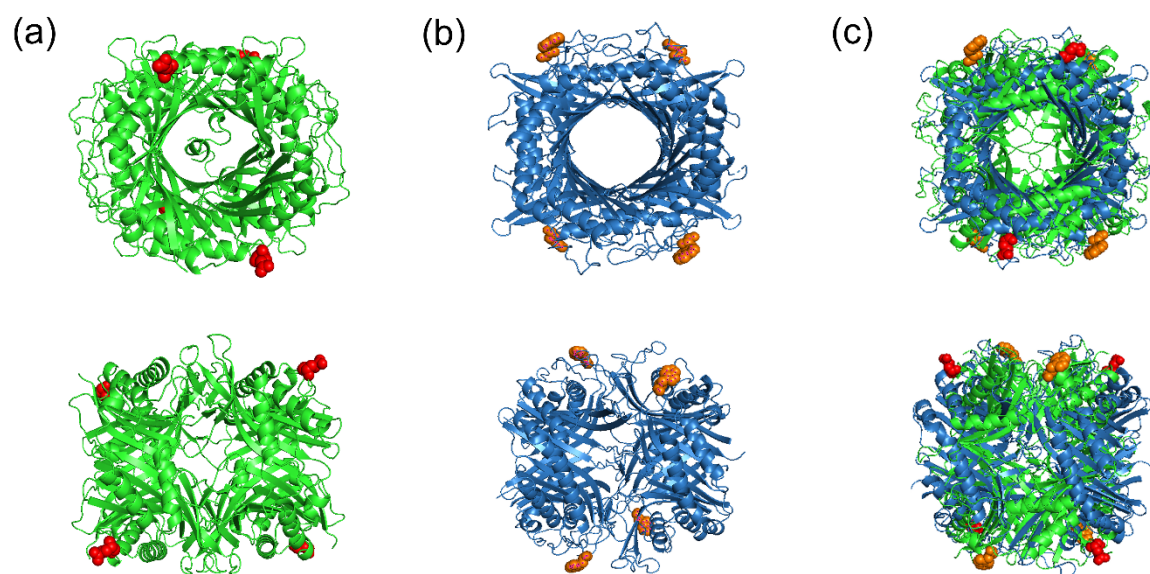

**Figure S3.** The crystal structures of urate oxidases from (a) *Arthrobacter globiformis* (AgUox) (PDB ID: 2YZE) and (b) *Aspergillus flavus* (AfUox) (PDB ID: 1WS2) (top panel: front view; bottom panel: side view). (c) The overlapped structures of AgUox and AfUox. The frTet incorporation sites are marked by spheres in red (E196 in AgUox) or orange (W174 in AfUox). The structures are visualized by PyMol [The PyMOL Molecular Graphics System, Version 1.2r3pre, Schrödinger, LLC].

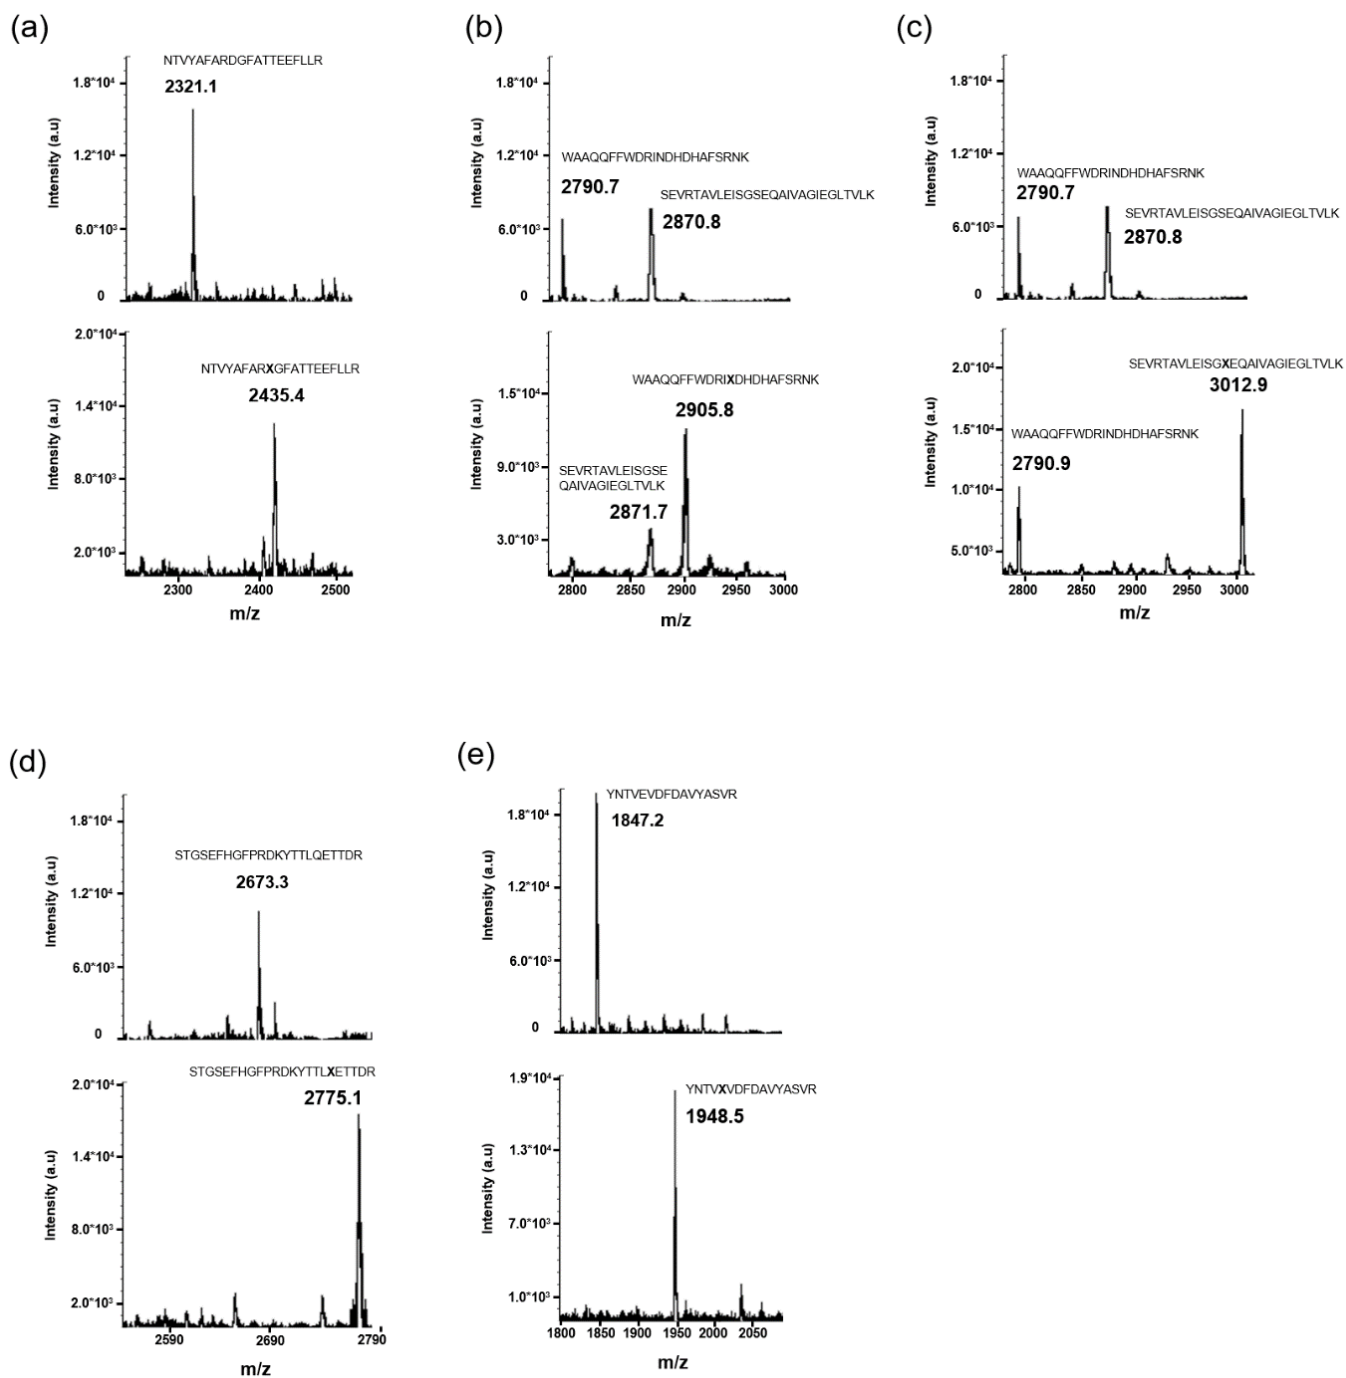

**Figure S4.** Matrix-assisted laser desorption/ionization-time of flight mass spectra (MALDI-TOF MS) of trypsin-digested (a) Ag1, (b) Ag6, (c) Ag8, (d) Ag10, and (e) Ag12. AgUox-WT was used as the control.

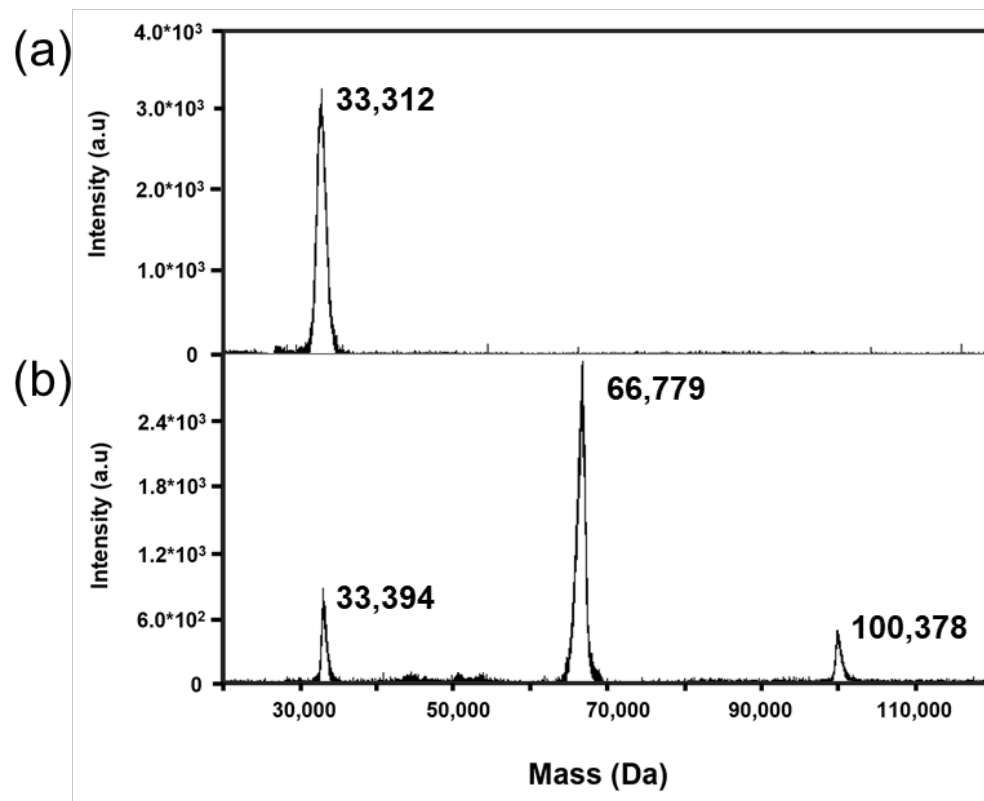

**Figure S5.** MALDI-TOF mass spectra of AgUox-WT (a) and the conjugate mixture generating Ag12-HSA (b). The samples were mixed with sinapinic acid (SA) matrix solution 2 (20 mg/mL of SA in 30:70 (v/v) acetonitrile: trifluoroacetic acid 0.1% in water) in a 1:1 ratio and then loaded onto ground steel target plate (Bruker Corporation, Billerica, MA, USA) coated with SA matrix solution 1 (20 mg/mL of SA in ethanol). The mass spectra of samples were obtained using a Microflex MALDI-TOF/MS (Bruker Corporation, Billerica, MA, USA).

**Table S1.** Primers used for the site-directed mutagenesis of AgUox

| Variants               | Forward                                         | Reverse                                         |
|------------------------|-------------------------------------------------|-------------------------------------------------|
| AgUox_80Amb<br>(Ag1)   | 5'-CGTGGCGAAACCCTAACGCGCGAACGCGTAC-3'           | 5'-GTACGCGTTCGCGCGTTAGGGTTTCGCCACG-3'           |
| AgUox_82Amb<br>(Ag2)   | 5'-TTCAGTCGTGGCCTAACCATCACGCGCGAACG-3'          | 5'-CGTTCGCGCGTGATGGTTAGGCCACGACTGAA-3'          |
| AgUox_100Amb<br>(Ag3)  | 5'-CCACCGGTAACCCAGTCCTAGCCTTCGGTAAAGTGT-3'      | 5'-ACACTTTACCGAAGGCTAGGACTGGGTACCGGTGG-3'       |
| AgUox_101Amb<br>(Ag4)  | 5'-CACCGGTAACCCACTAAAAGCCTTCGGTAAAGTGTTCGCC-3'  | 5'-GGGCAAACACTTTACCGAAGGCTTTAGTGGGTACCGGTG-3'   |
| AgUox_114Amb<br>(Ag5)  | 5'-TACGGTCCCACTAGAACTGCTGGGCAGCCCA-3'           | 5'-TGGGCTGCCCAGCAGTTCTAGTGGGACCGTA-3'           |
| AgUox_119Amb<br>(Ag6)  | 5'-ATGCATGGTCGTGGTCCTAGATACGGTCCAGAAG-3'        | 5'-CTTCTGGGACCGTATCTAGGACCACGACCATGCAT-3'       |
| AgUox_120Amb<br>(Ag7)  | 5'-GAGAATGCATGGTCGTGCTAGTTGATACGGTCCAGA-3'      | 5'-TCTGGGACCGTATCAACTAGCACGACCATGCATTCTC-3'     |
| AgUox_142Amb<br>(Ag8)  | 5'-CAGCTACGATCGCCTGTTCTAACCCAGAGATTCCAGTAC-3'   | 5'-GTAAGTGAATCTCTGGTTAGGAACAGGCGATCGTAGCTG-3'   |
| AgUox_143Amb<br>(Ag9)  | 5'-GCCAGCTACGATCGCCTGCTAAGAACCCAGAGATTCCAG-3'   | 5'-CTGGAATCTCTGGTTCTTAGCAGGCGATCGTAGCTGGC-3'    |
| AgUox_175Amb<br>(Ag10) | 5'-ACGGTCGGTGGTTTCCTACAGCGTGGTATATTAT-3'        | 5'-ATAAATATACCACGCTGTAGGAAACCACCGACCGT-3'       |
| AgUox_195Amb<br>(Ag11) | 5'-CAGCGTCGAAGTCCACTTCCTAGGTGTTGTAACGCCAACGG-3' | 5'-CCGTTGGCGTTACAACACCTAGGAAGTGGACTTCGACGCTG-3' |
| AgUox_196Amb<br>(Ag12) | 5'-GTCGAAGTCCACCTATACGGTGTGTAACGCCAACGG-3'      | 5'-CCGTTGGCGTTACAACACCGTATAGGTGGACTTCGAC-3'     |
| AgUox_218Amb<br>(Ag13) | 5'-CAGGGCCAGGGACTAAGTTTCTGCGAATGCTTTCAGCA-3'    | 5'-TGCTGAAAGCATTCGCAGAACTTAGTCCCTGGCCCTG-3'     |
| AgUox_238Amb<br>(Ag14) | 5'-CTTGATTTCGTCAATTCCTAGTGGGTCTCGATAACCGCG-3'   | 5'-CGCGGTTATCGAGACCCACTAGGAAATTGACGAAATCAAG-3'  |

**Table S2.** ROSETTA scores of AgUox after point mutation into (a) tryptophan or (b) tyrosine

(a)

| Mutation site | ROSETTA score |
|---------------|---------------|
| E196          | 2582.93       |
| E143          | 2535.44       |
| WT            | 2523.29       |
| P238          | 2518.78       |
| F114          | 2508.66       |
| V195          | 2505.66       |
| N119          | 2501.68       |
| S142          | 2501.24       |
| H218          | 2499.75       |
| Q175          | 2498.62       |
| D80           | 2490.78       |
| D120          | 2486.32       |
| F100          | 2479.7        |
| D101          | 2479.7        |
| F82           | 2408.17       |

(b)

| Mutation site | ROSETTA score |
|---------------|---------------|
| E196          | 2596.28       |
| E143          | 2547.95       |
| N119          | 2526.71       |
| WT            | 2523.29       |
| F100          | 2517.66       |
| D101          | 2517.16       |
| F114          | 2514.91       |
| F82           | 2511.90       |
| Q175          | 2511.29       |
| P238          | 2511.12       |
| S142          | 2509.92       |
| D80           | 2507.26       |
| D120          | 2503.98       |
| H218          | 2499.57       |
| V195          | 2145.17       |

**Table S3.** List of masses of trypsin digested AgUox-frTet variants

| Variants | Mutation site | Theoretical mass (m/z) | Observed mass (m/z) | sequence                                             |
|----------|---------------|------------------------|---------------------|------------------------------------------------------|
| Ag1      | D80           | 2435.3                 | 2435.4              | NTVYAFAR <b>D<sub>80</sub></b> GFATTEEFLLR           |
| Ag6      | N119          | 2904.4                 | 2905.8              | WAAQQFFWDRIN <b>N<sub>119</sub></b> DHDHAFSRNK       |
| Ag8      | S142          | 3011.8                 | 3012.9              | SEVRTAVLEISGS <b>S<sub>142</sub></b> EQAIVAGIEGLTVLK |
| Ag10     | Q175          | 2774.4                 | 2775.1              | STGSEFHGFPRDKYTTL <b>Q<sub>175</sub></b> ETDR        |
| Ag12     | E196          | 1948.0                 | 1948.5              | YNTV <b>E<sub>196</sub></b> VDFDAVYASVR              |

## References

1. Madeira, F.; Park, Y. mi; Lee, J.; Buso, N.; Gur, T.; Madhusoodanan, N.; Basutkar, P.; Tivey, A.R.N.; Potter, S.C.; Finn, R.D.; et al. The EMBL-EBI search and sequence analysis tools APIs in 2019. *Nucleic Acids Res.* **2019**, *47*, 636–641, doi:10.1093/NAR/GKZ268.
